# Supplementary material for: Disruption of Cancer Metabolic SREBP1/miR-142-5p Suppresses Epithelial–Mesenchymal Transition and Stemness in Esophageal Carcinoma
Source: Cells. 2019 Dec 18;9(1):7. doi: 10.3390/cells9010007 (PMC7016574; doi:10.3390/cells9010007)
Supplement: Supplementary file 1 [file cells-09-00007-s001.pdf]

## SUPPLEMENTARY INFORMATION

### **Disruption of cancer metabolism SREBP1/miR-142-5p circuit suppresses epithelial-mesenchymal transition and stemness in esophageal carcinoma**

Chih-Ming Huang 1#, Chin-Sheng Huang 2,3#, Tung-Nien Hsu<sup>2,3</sup>, Mao-Suan Huang<sup>2,3</sup>, Iat-Hang Fong<sup>4,5</sup>, Wei-Hwa Lee<sup>4,5\*</sup>, Shao-Cheng Liu<sup>6\*</sup>

1 Department of Otolaryngology, Taitung Mackay Memorial Hospital, Taitung City 950, Taiwan;

2 Division of Oral and Maxillofacial Surgery, Department of Dentistry, Taipei Medical University - Shuang Ho Hospital, New Taipei City 235, Taiwan;

3 School of Dentistry, College of Oral Medicine, Taipei Medical University, Taipei City 110, Taiwan;

4Department of Medical Research & Education, Taipei Medical University - Shuang Ho Hospital, New Taipei City, 235, Taiwan

5Department of Pathology, Taipei Medical University-Shuang Ho Hospital, New Taipei City, Taiwan

6 Department of Otolaryngology-Head and Neck Surgery, Tri-Service General Hospital, National Defense Medical Center, Taipei City, 114, Taiwan

#Co-first authors.

\* Corresponding Author

Wei-Hwa Lee, MD., PhD. Professor

Department of Pathology, Taipei Medical University-Shuang Ho Hospital, New Taipei City, Taiwan.

Phone: +886-2-2490088 ext. 8742; FAX: 886-2-2248-0900; E-mail: [whlpath97616@s.tmu.edu.tw](mailto:whlpath97616@s.tmu.edu.tw)

Shao-Cheng Liu, MD., Ph.D. Associate Professor

Department of Otolaryngology-Head and Neck Surgery, Tri-Service General Hospital, National Defense Medical Center, Taipei City, 114, Taiwan

Phone: +886-2-87927192. FAX: 886-2-87927193

E-mail: [m871435@ndmctsgh.edu.tw](mailto:m871435@ndmctsgh.edu.tw)

Supplementary Table S1

| No. |                      | Target     | Dilution |            | Source        |
|-----|----------------------|------------|----------|------------|---------------|
| 1   | Western blots        | SREBP-1    | 1:1000   | ab191857   | abcam         |
| 2   |                      | ZEB1       | 1:2000   | ab228986   | abcam         |
| 3   |                      | Vimentin   | 1:1000   | #5741      | cellsignaling |
| 4   |                      | E-Cadherin | 1:1000   | 20874-1-AP | PROTEINTECH   |
| 5   |                      | GAPDH      | 1:10000  | 10494-1-AP | PROTEINTECH   |
| 6   | Immunohistochemistry | SREBP-1    | 1:100    | ab28481    | abcam         |
| 7   |                      | ZEB1       | 1:100    | ab228986   | abcam         |
| 8   |                      | Vimentin   | 1:200    | ab92547    | abcam         |
| 9   |                      | E-Cadherin | 1:500    | 20874-1-AP | PROTEINTECH   |
| 10  |                      | Ki-67      | 1:100    | MA5-14520  | ThermoFsher   |

## Supplementary Figure S1

**A**

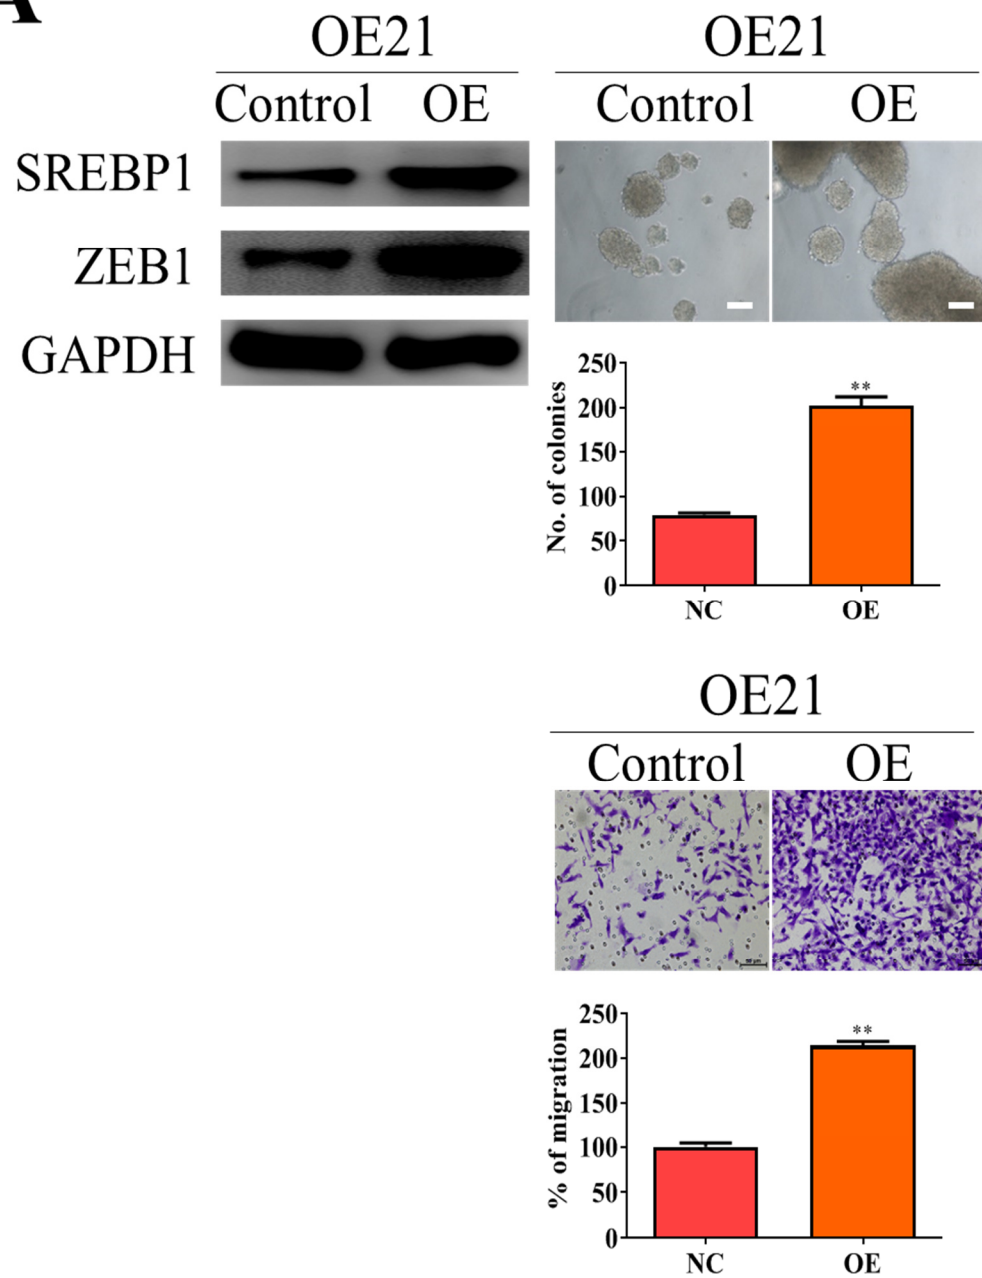

**B**

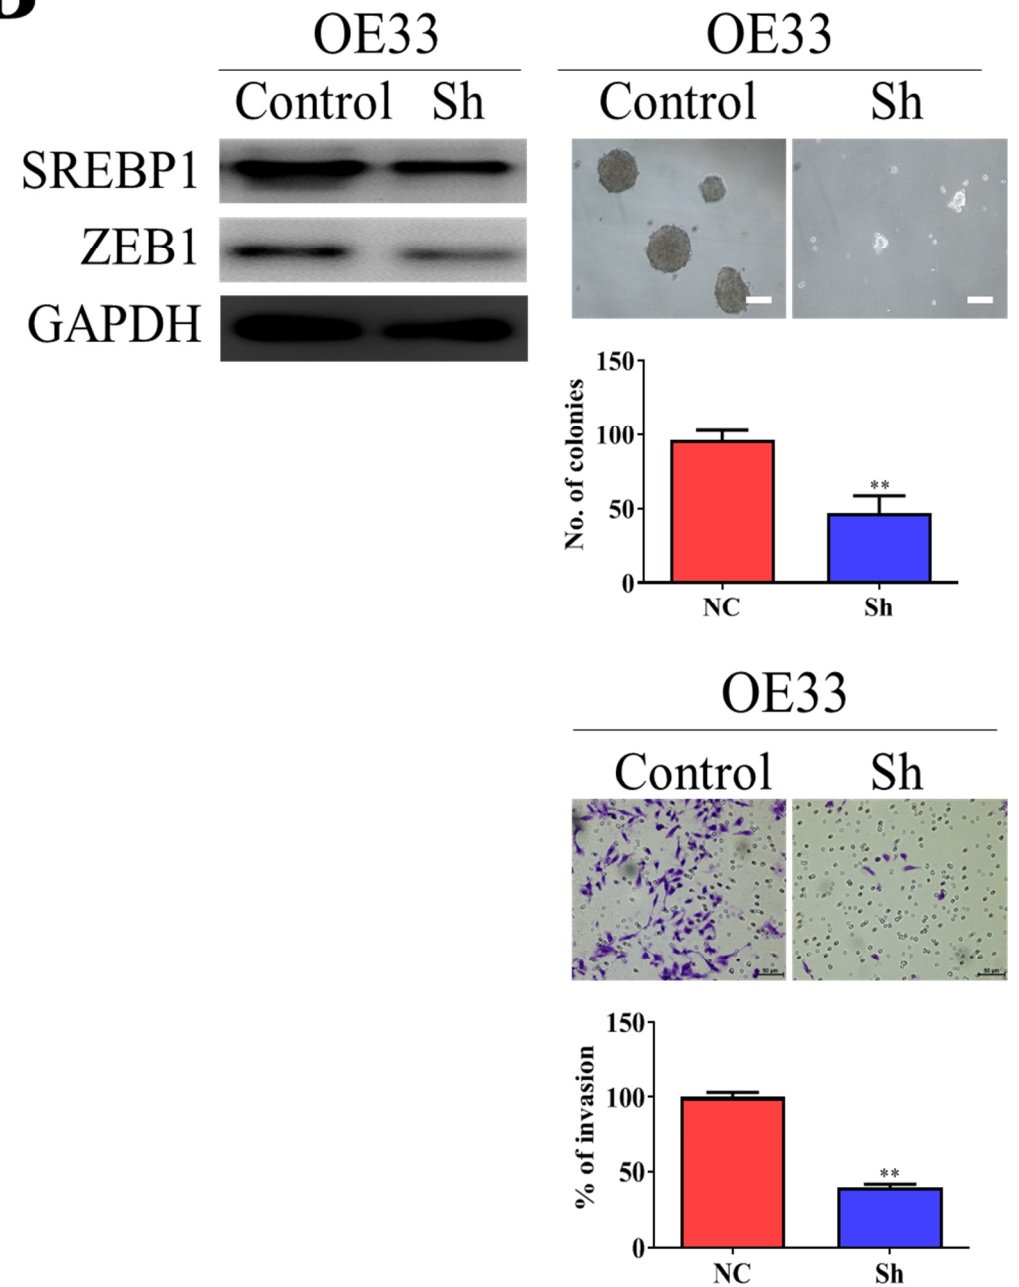

**Supplementary Figure S1.** Overexpression (OE) and silencing (Sh) of SREBP1 in OE21 and OE33 cells. (A) SREBP1-overexpressing OE21 showed increased ZEB1 expression accompanied with enhanced tumor sphere forming (upper panel) and invasive potential (lower panel). (B) SREBP1-silenced OE33 cells showed the opposite effects.

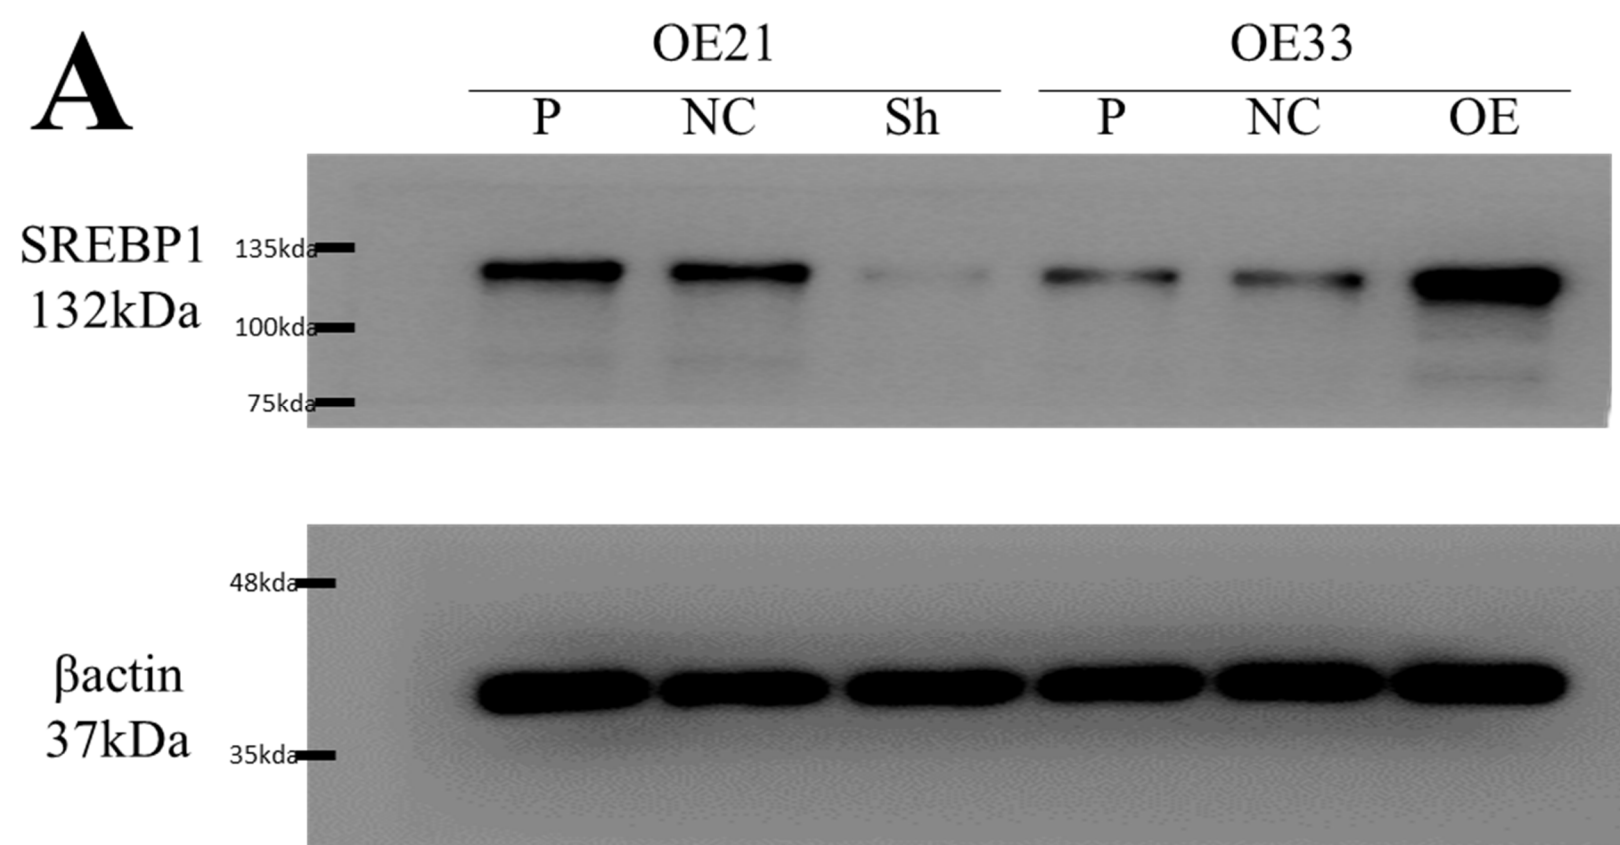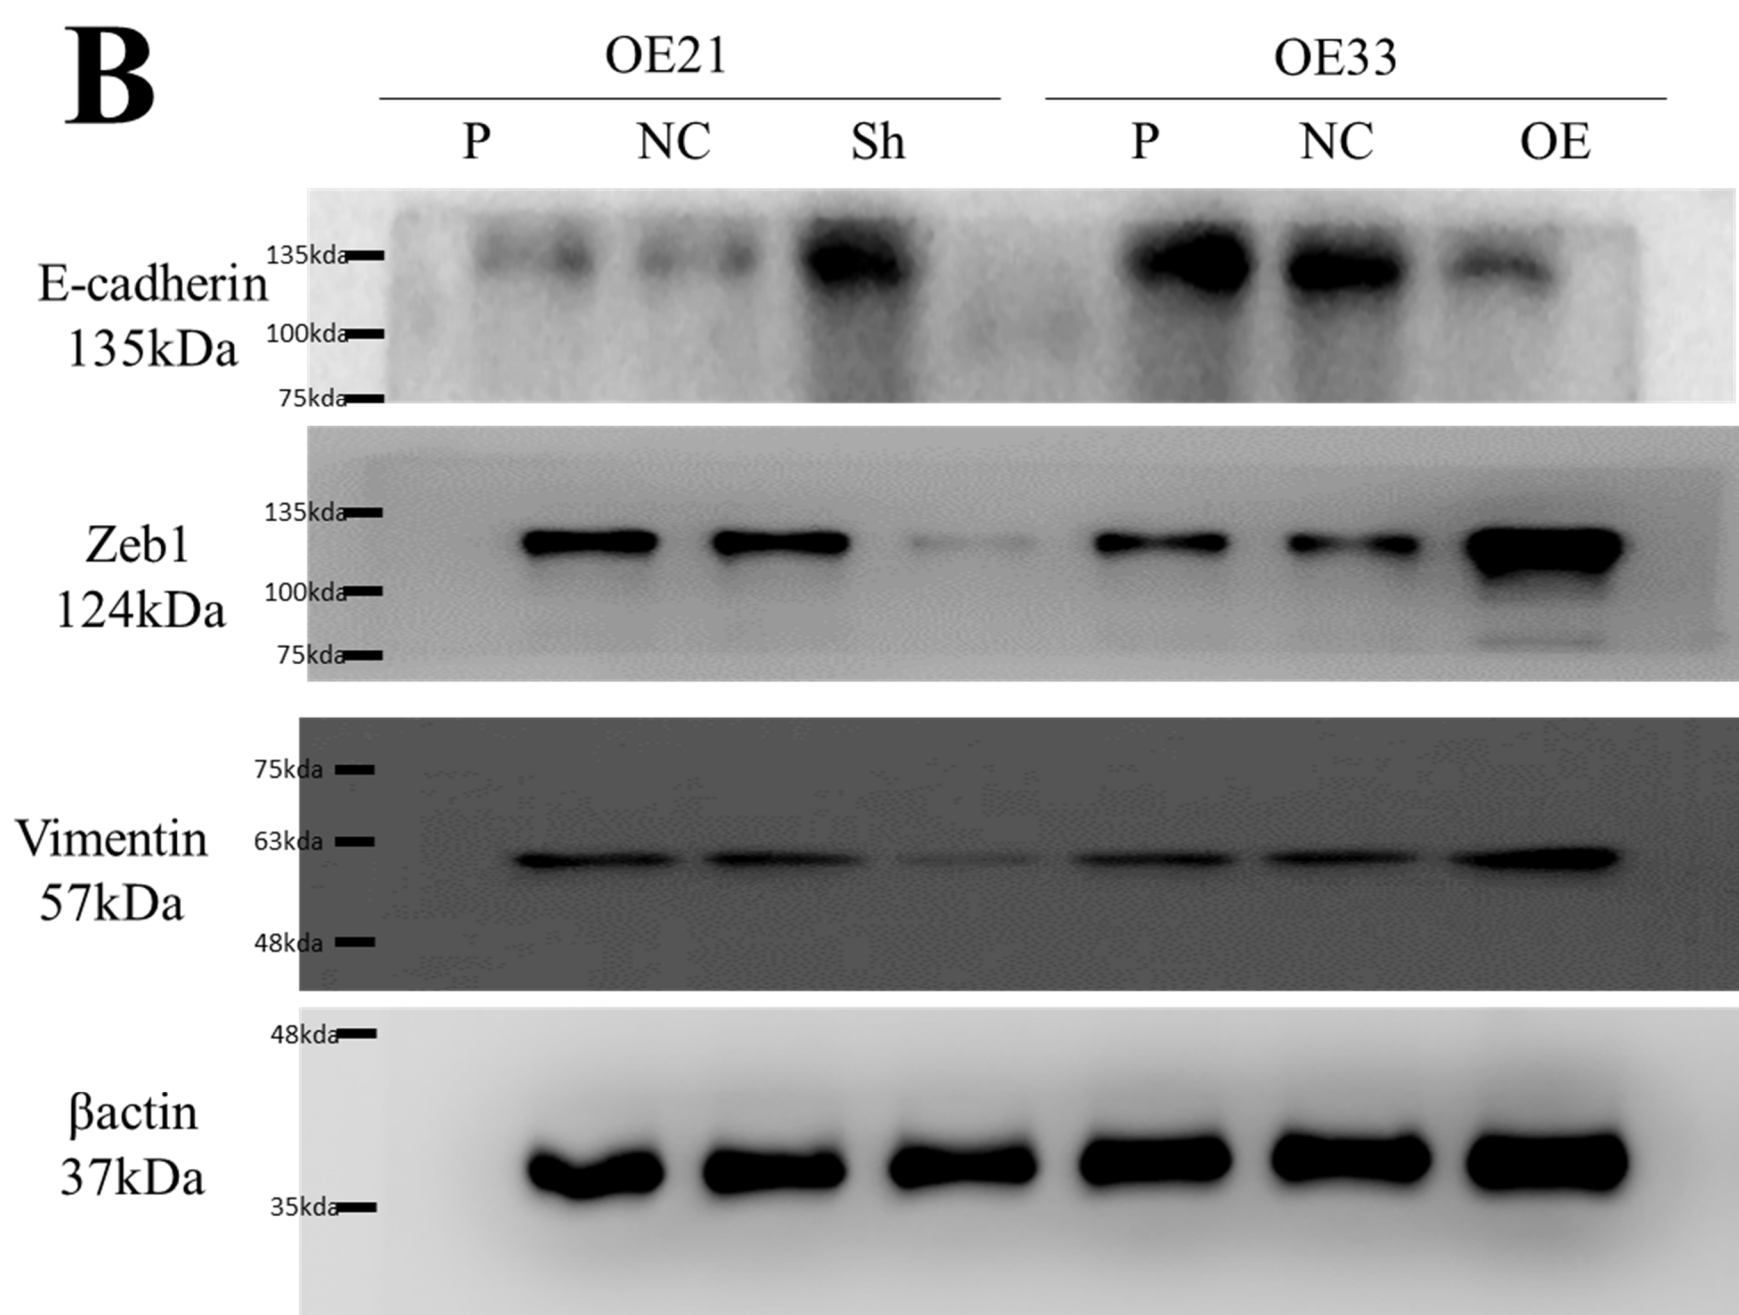

**Supplementary Figure S2.** Full-size blots of Figure 2

**A**

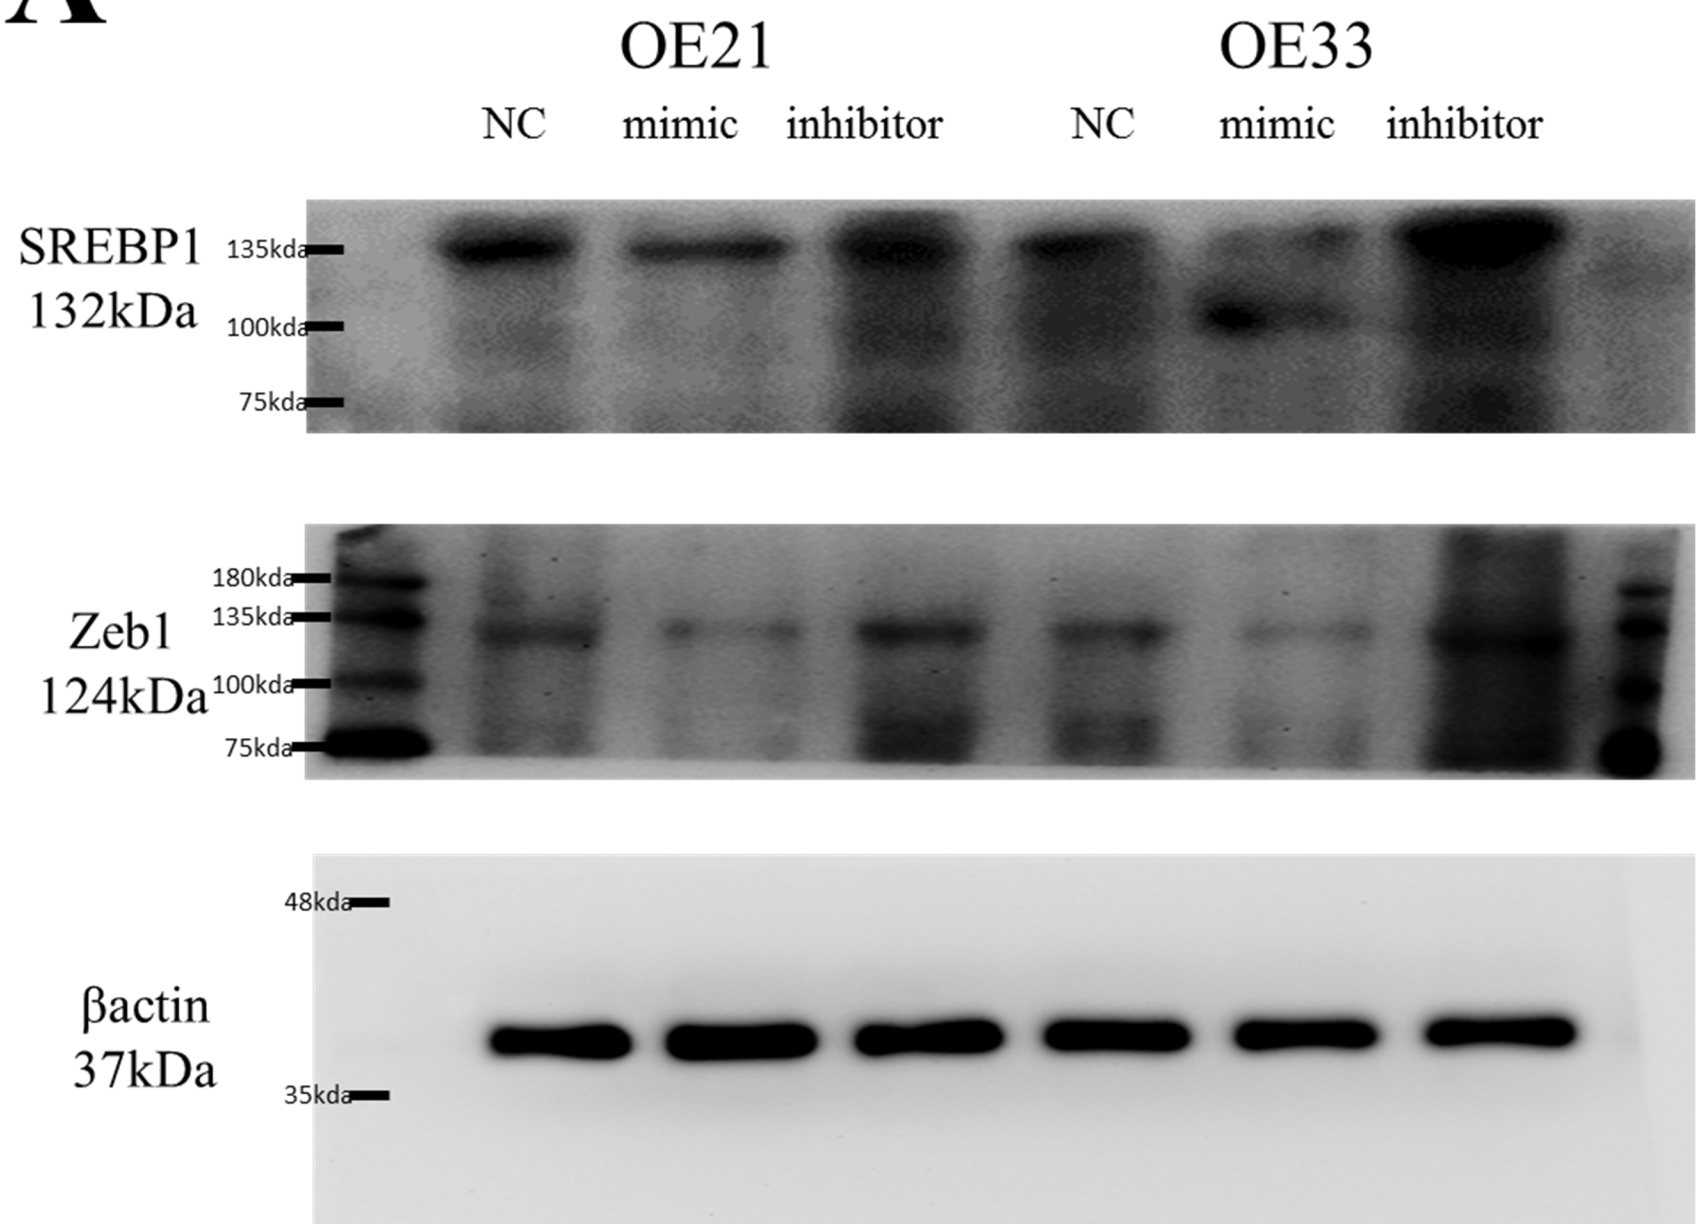

**Supplementary Figure S3.** Full-size blots of Figure 3C

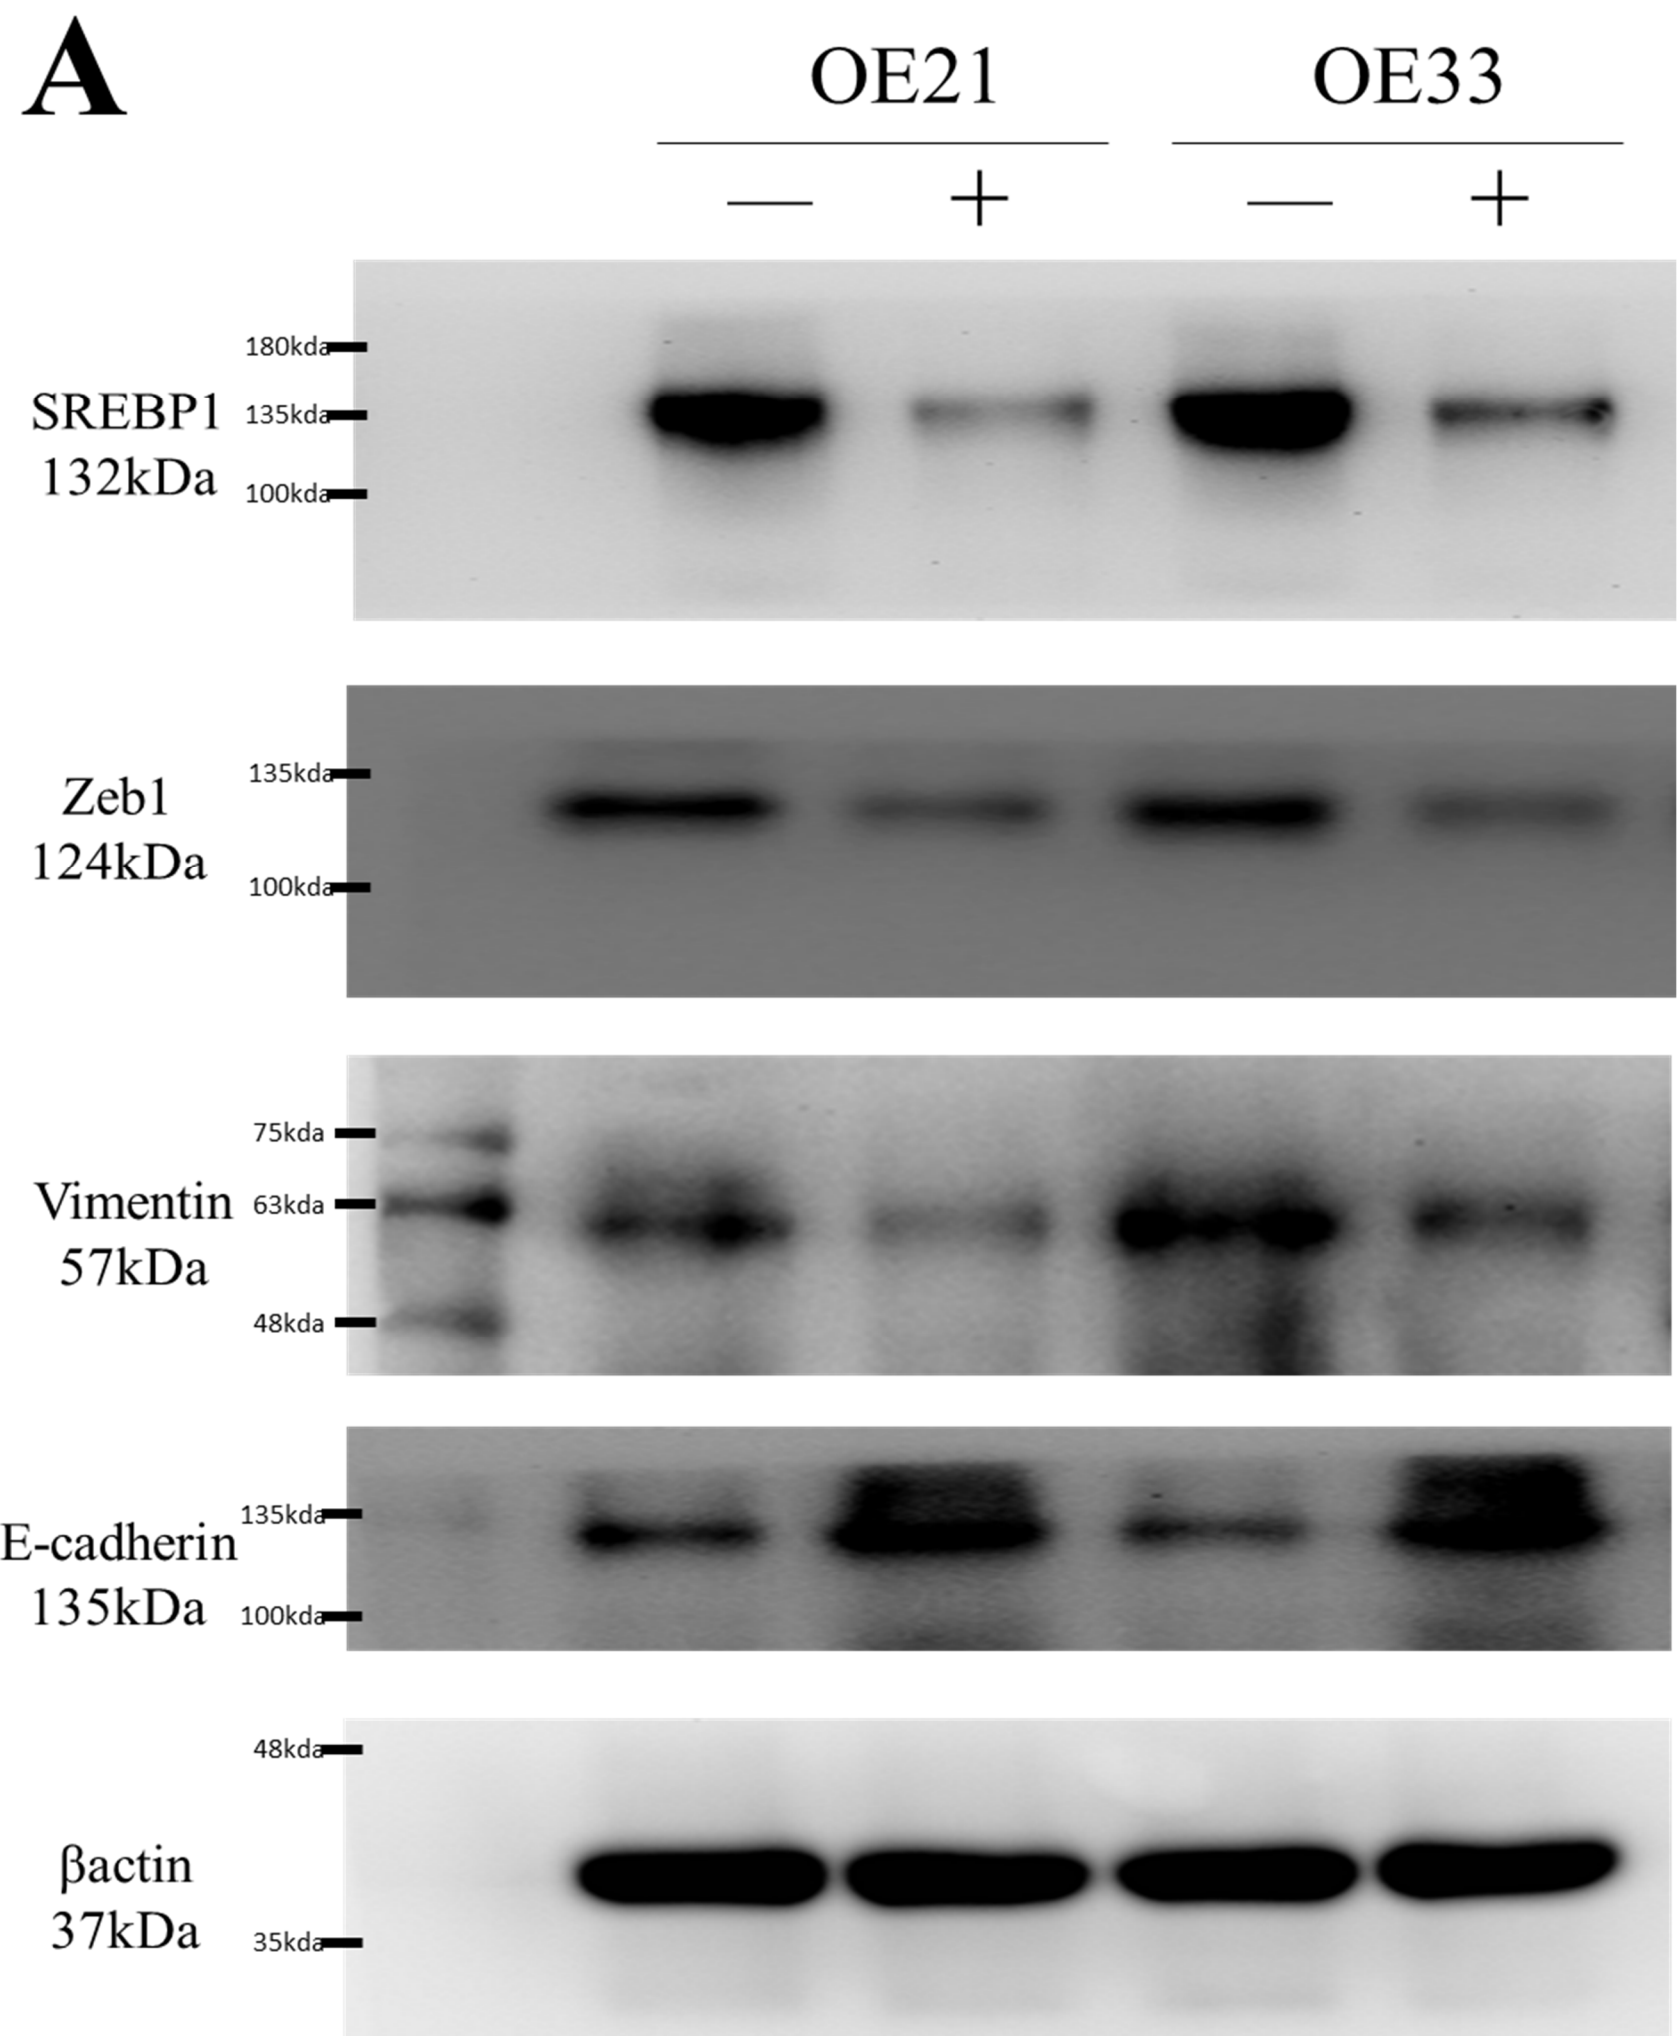

**Supplementary Figure S4.** Full-size blots of Figure 4C

**A**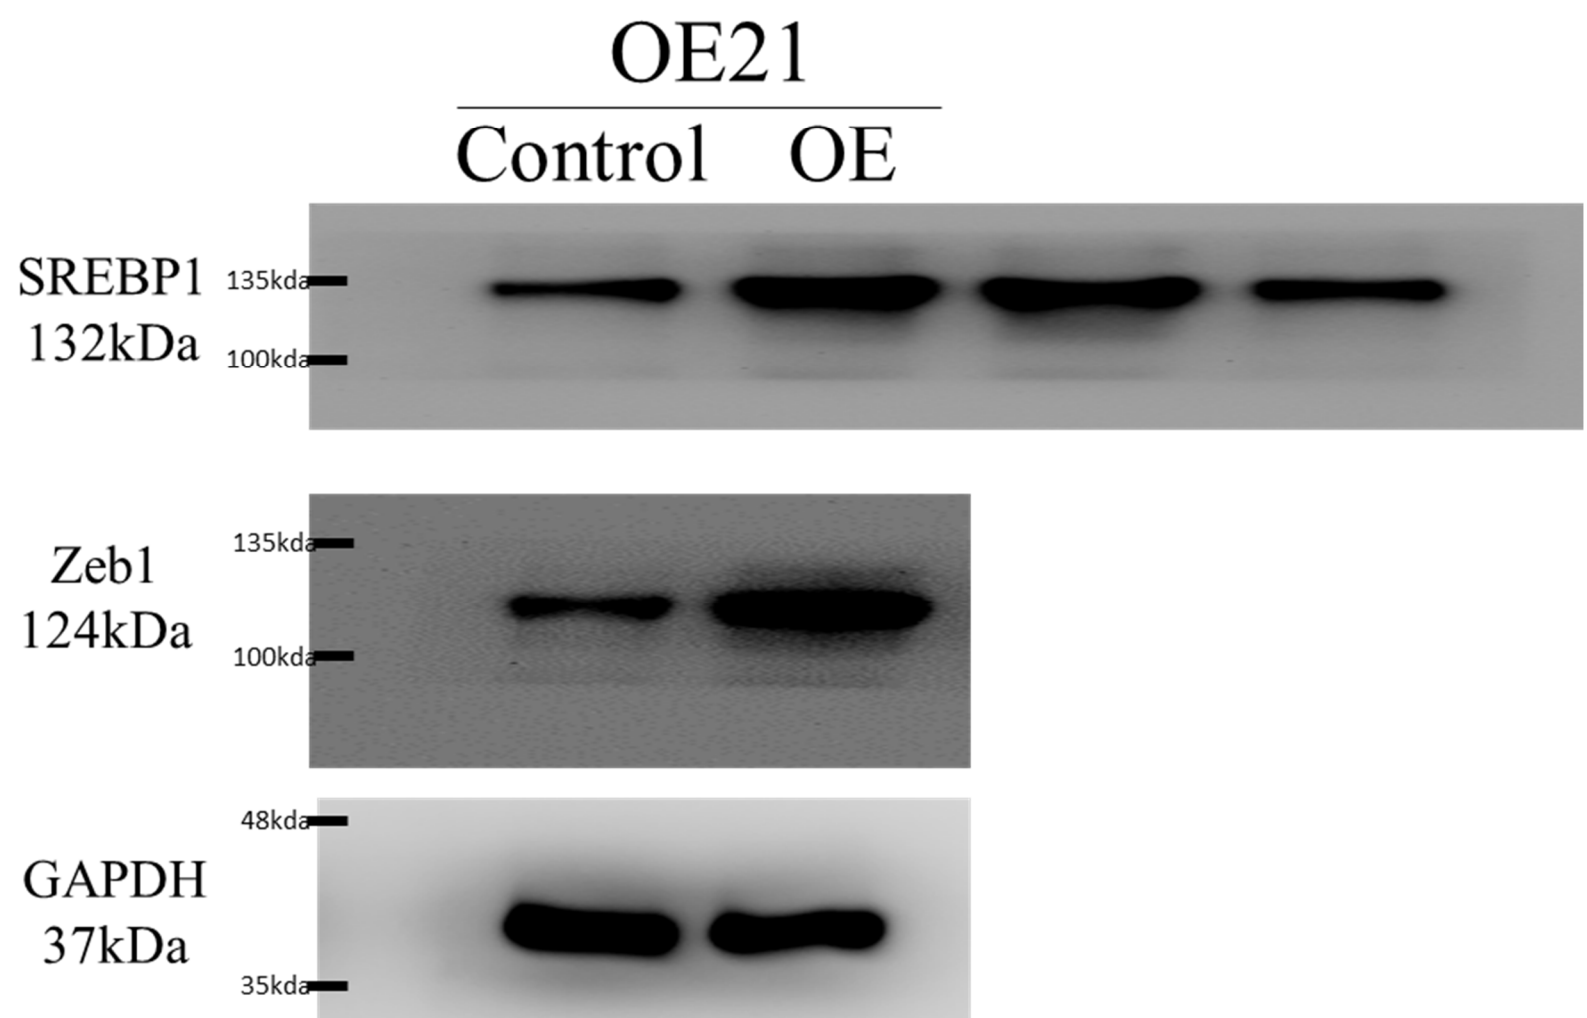**B**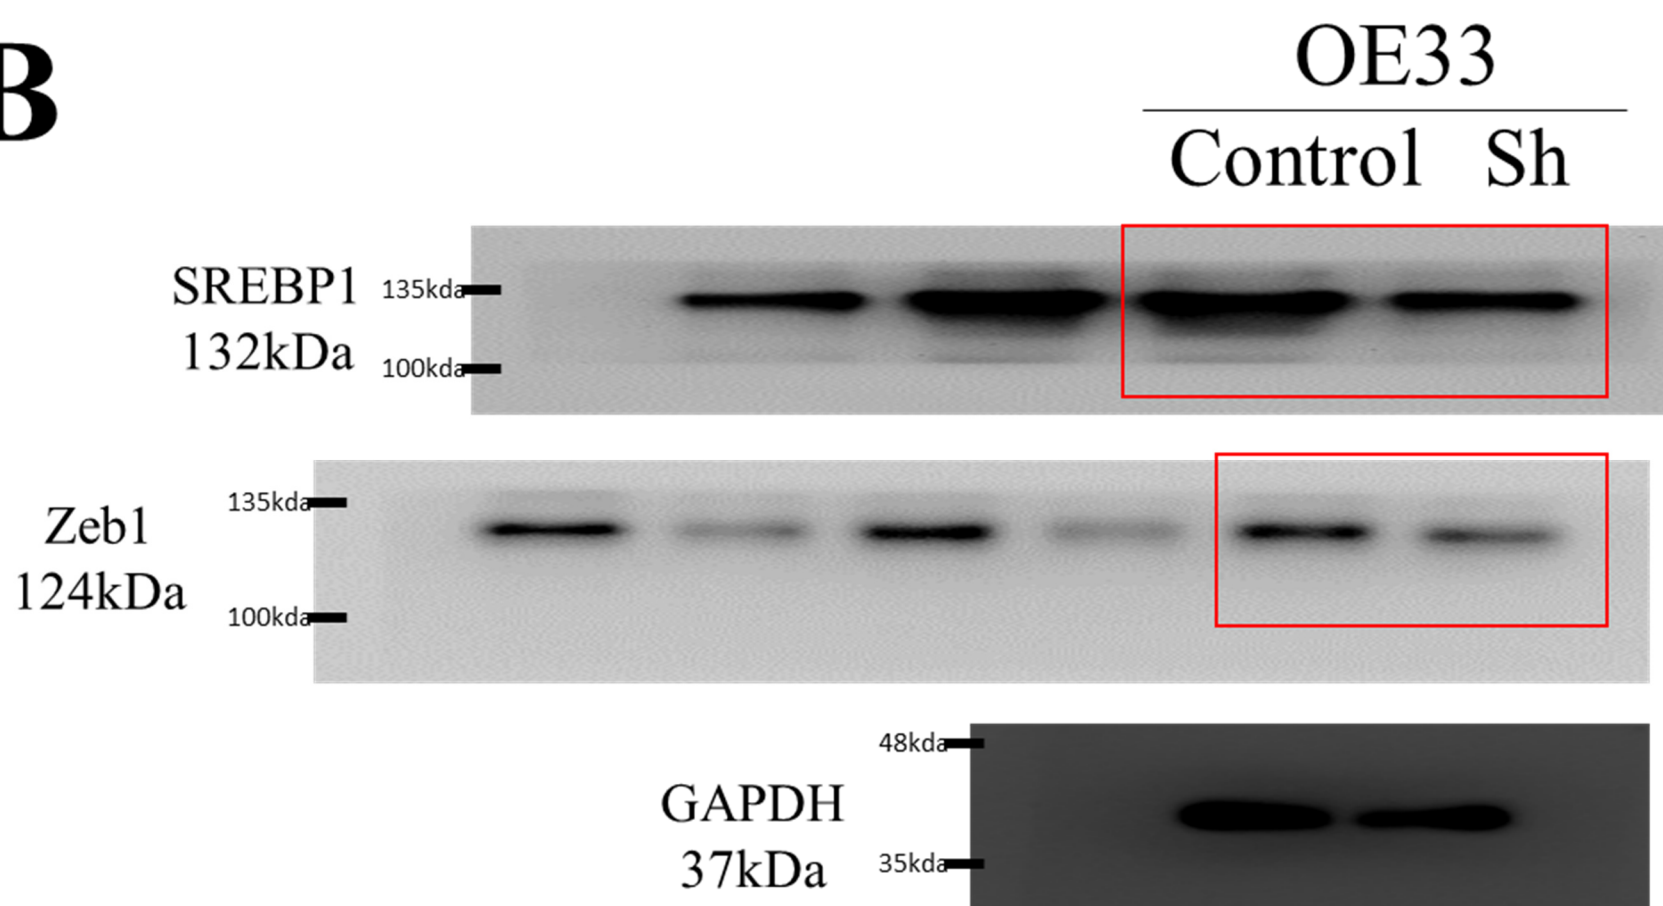

**Supplementary Figure S5.** Full-size blots of Supplementary Figure S1
